# Supplementary material for: Antibody Responses after SARS-CoV-2 Vaccination in Patients with Liver Diseases
Source: MDPI journal article supplement (doi:10.3390/v14020207), 2022-01-21
Supplement: s1 [file s1]

## Supplementary material

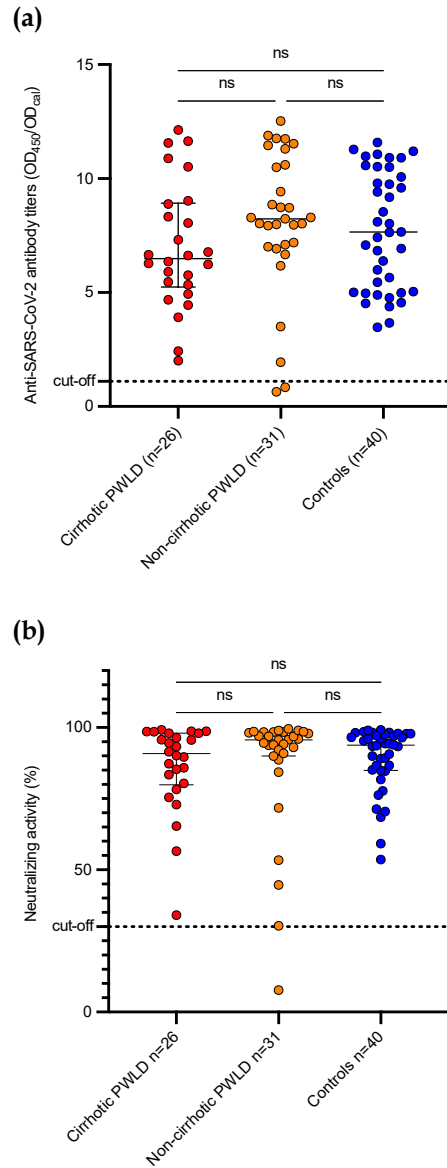

**Supplementary Figure S1.** Humoral immune responses one month after the second vaccine dose in cirrhotic PWLD, non-cirrhotic PWLD and controls after exclusion of cases receiving immunosuppressive treatment.

**Abbreviations:** ns: non-statistically significant; SARS-Cov-2: severe acute respiratory syndrome coronavirus 2; OD: Optical density; PWLD: Patients with liver diseases
